# Supplementary material for: Redox and catalase-like activities of four widely used carbon monoxide releasing molecules (CO-RMs)
Source: Royal Society of Chemistry journal article supplement (doi:10.1039/d1sc03832j), 2021-01-01
Supplement: d1sc03832j1.pdf [file d1sc03832j1.pdf]

## Supporting information for

# Redox and Catalase-like Activities of Four Widely used Carbon Monoxide Releasing Molecules (CO-RMs)

Zhengnan Yuan, Xiaoxiao Yang and Binghe Wang\*

Department of Chemistry and Center for Diagnostics and Therapeutics, Georgia State University, Atlanta, Georgia 30303, USA.

\* To whom correspondence should be addressed: wang@gsu.edu (B. Wang)

## Table of Contents

|                                                                                                                      | page No. |
|----------------------------------------------------------------------------------------------------------------------|----------|
| General information                                                                                                  | 2        |
| Stock solution preparation                                                                                           | 2        |
| Hydrogen peroxide titration                                                                                          | 2        |
| Preparation of ABTS radical and DPPH solutions                                                                       | 2        |
| ABTS and DPPH decolorization assays                                                                                  | 3        |
| Table S1. GC method for semi-quantification of oxygen                                                                | 3        |
| Detection of hydrogen peroxide in cell culture medium                                                                | 3        |
| Figure S1. UV-vis spectra of 10 mM H <sub>2</sub> O <sub>2</sub> upon treatment with CORM-2                          | 4        |
| Figure S2. A proposed mechanism for Ru-mediated H <sub>2</sub> O <sub>2</sub> disproportionation                     | 4        |
| Figure S3. Time-dependent changes of H <sub>2</sub> O <sub>2</sub> concentration upon incubations with CORM-2        | 5        |
| Figure S4. Time-dependent changes of H <sub>2</sub> O <sub>2</sub> concentration upon incubations with CORM-2 (DMSO) | 5        |
| Figure S5. Time-dependent changes of H <sub>2</sub> O <sub>2</sub> concentration upon incubations with CORM-3        | 6        |
| Figure S6. Time-dependent changes of H <sub>2</sub> O <sub>2</sub> concentration upon incubations with iCORM-3       | 6        |
| Figure S7. Changes of H <sub>2</sub> O <sub>2</sub> concentration upon incubations with CO-111 and CP-111            | 7        |
| Figure S8. Decrease of UV absorbance of the ABTS radical upon treatment with Trolox                                  | 7        |
| Figure S9. Decrease of ABTS radical concentration upon incubation with iCORM-2 and Trolox.                           | 8        |
| Figure S10. Time-dependent decrease of ABTS radical concentration in various ratios of ethanol solution              | 8        |
| Figure S11. Decrease of ABTS radical concentration upon incubation with CORM-3                                       | 9        |
| Figure S12. Time-dependent changes of H <sub>2</sub> O <sub>2</sub> concentration upon treatments with CORM-A1       | 9        |
| Figure S13. Decrease of ABTS radical concentration upon treatments with CORM-A1 and CORM-401                         | 10       |
| Figure S14. UV-vis spectra of DPPH upon treatment with CORM-A1                                                       | 10       |
| Figure S15. Fluorescence detection of H <sub>2</sub> O <sub>2</sub> by PF-1                                          | 11       |
| Figure S16. Fluorescence detection of H <sub>2</sub> O <sub>2</sub> in cell culture medium                           | 11       |
| References                                                                                                           | 12       |

**General information.** All reagents and solvents were of reagent grade from commercial suppliers (e.g., Sigma Aldrich). A microplate reader (PerkinElmer Victor2, USA) was used for the H<sub>2</sub>O<sub>2</sub> titration assay. Absorption spectra were measured on Varian Cary 100 Bio UV-Visible spectrophotometer. CO-RMs (CORM-2, CORM-3, CORM-A1 and CORM-401) were from Sigma-Aldrich and were used without purification. Catalase from bovine liver (2000-5000 units/mg) was from Sigma-Aldrich (C9322). Solutions of iCORM-2 and iCORM-3 were prepared according to literature procedures.<sup>1, 2</sup> The hydrogen peroxide fluorescent probe, PF-1, was synthesized according to literature procedures.<sup>3</sup>

**Stock solution preparation.** Stock solutions of CORM-2 (2 mM) were prepared either in methanol or DMSO. Stock solutions of CORM-3 (2 mM) and CORM-A1 (10 mM) were prepared in water. Stock solutions of CORM-401 (10 mM) and catalase were prepared in PBS buffer (pH=7.4, 0.01 M). Stock solutions of Ru(DMSO)<sub>4</sub>Cl<sub>2</sub> (2 mM), Trolox (2 mM), BW-CO-111 (2 mM) and BW-CP-111 (2 mM) were prepared in DMSO. Stock solutions of DPPH (1 mM) were prepared in methanol. All stock solutions were freshly prepared before the experiments.

**Hydrogen peroxide titration.** The concentration of H<sub>2</sub>O<sub>2</sub> was determined by a reported colorimetric assay with modifications.<sup>4</sup> The detection mechanism is based on the reaction among H<sub>2</sub>O<sub>2</sub>, 4-aminoantipyrine, phenol and horseradish peroxidase (HRP) to generate a pink quinone imine dye, which can be easily monitored by measuring the absorbance at 490 nm. Specifically, the stock solutions of phenol (500 mM), 4-aminoantipyrine (50 mM) and HRP (150 unit/ml) were prepared separately in water. The stock solutions of these compounds were further diluted by PBS buffer (pH=7.4, 0.01 M) to generate a detection mixture containing phenol (12 mM), 4-aminoantipyrine (1 mM) and HRP (1 unit/ml). To establish a standard curve, H<sub>2</sub>O<sub>2</sub> solutions (final concentration: 25 to 440  $\mu$ M) were added to the detection mixture. The resulting mixture was incubated for 30 min before measuring the absorbance at 490 nm by using a plate reader. For H<sub>2</sub>O<sub>2</sub> titration, a suitable volume of the reaction solution was titrated into the detection mixture, and the final concentration of H<sub>2</sub>O<sub>2</sub> should be in the detection range from the standard curve. The resulting mixture solutions were incubated for 30 min followed by measuring the absorbance at 490 nm.

**Preparations of ABTS radical and DPPH solutions.** The ABTS radical solution was prepared according to a literature procedure.<sup>5, 6</sup> A 7-mM solution of ABTS was prepared by dissolving ABTS in 20 mM acetate buffer (pH 4.5). A 2.45-mM potassium persulfate solution was prepared in water. The stock solution of ABTS radical was prepared by mixing the ABTS solution and potassium persulfate solution in a 1:1 ratio. The resulting mixture was incubated for 16 h in the dark to generate a dark green-blue solution, which was further diluted with ethanol for the reaction with CO-RMs and Trolox. The 0.2-mM solution of the DPPH radical was freshly prepared by dissolving DPPH in methanol.

**ABTS and DPPH decolorization assays.** 1 ml of ABTS solution or DPPH solution was incubated with various concentrations of CO-RMs under dark conditions for 6 min or 1 h, respectively. Then, the UV-Vis absorption spectra of the reaction solutions were measured.

**GC method for semi-quantification of oxygen.** In 6-ml headspace vials, various reaction solutions (group 1 to 6) were charged. The headspace vials were capped with an aluminum seal with PTFE/rubber liner during the 1 h incubation at room temperature. After incubation, for each group, 250  $\mu$ L of gas sample was taken from the headspace by a gas-tight syringe (Hamilton®). The gas sample was analyzed by a GC system with TCD detection. Helium was used as the carrier gas with a flow rate of 30 mL/min. Gaseous components of the headspace were separated by passing through a packed column (60/80 Carboxen-1000 matrix support, L $\times$ O.D. $\times$ I.D. 15.0 ft (4.6 m) $\times$ 1/8 in  $\times$ 2.1 mm, Supelco). The column was heated to 35  $^{\circ}$ C for 5 min, and then the column temperature was increased to 225  $^{\circ}$ C at a rate of 20  $^{\circ}$ C/min while the detector temperature was held at 125  $^{\circ}$ C.

Group 1: 4 ml of PBS buffer (pH=7.4, 0.01 M)

Group 2: 4 ml of PBS buffer (pH=7.4, 0.01 M), spiked with 230  $\mu$ L (~0.01 mmol) O<sub>2</sub>

Group 3: 4 ml of PBS buffer (pH=7.4, 0.01 M), spiked with 450  $\mu$ L (~0.02 mmol) O<sub>2</sub>

Group 4: 4 ml of 10 mM H<sub>2</sub>O<sub>2</sub> in PBS buffer (pH=7.4, 0.01 M)

Group 5: 4 ml of 5 mM H<sub>2</sub>O<sub>2</sub> in PBS buffer (pH=7.4, 0.01 M) containing 0.02 mM CORM-2

Group 6: 4 ml of 10 mM H<sub>2</sub>O<sub>2</sub> in PBS buffer (pH=7.4, 0.01 M) containing 0.02 mM CORM-2

Table S1. Detection of oxygen generation from H<sub>2</sub>O<sub>2</sub> disproportionation by GC.

| Group | Oxygen peak (area) |                 |
|-------|--------------------|-----------------|
|       | 1 <sup>st</sup>    | 2 <sup>nd</sup> |
| 1     | 12665              | 12794           |
| 2     | 13939              | 14236           |
| 3     | 15524              | 15492           |
| 4     | 12601              | 12602           |
| 5     | 14530              | 14191           |
| 6     | 15950              | 15833           |

**Detection of hydrogen peroxide in cell culture medium after treatment with CO-RMs.** A fluorescence probe (PF-1) was used to measure the concentration of H<sub>2</sub>O<sub>2</sub> in cell culture medium.<sup>3</sup> To generate a standard curve, 10  $\mu$ M of PF-1 was incubated with 10  $\mu$ M to 120  $\mu$ M of H<sub>2</sub>O<sub>2</sub> in FluoroBrite™ DMEM (A1896701, Thermo Fisher Scientific) for 1 h at 37  $^{\circ}$ C. After incubation, 100  $\mu$ L of the solution from each reaction mixture was added to a single well in a 96

well plate. The fluorescence (excitation wavelength: 490 nm emission wavelength: 525 nm) was measured by using a plate reader. For CO-RM-treated groups, 100  $\mu\text{M}$  of  $\text{H}_2\text{O}_2$  solutions were first incubated with various concentrations of CORM-2, CORM-3, iCORM-2 or iCORM-3 in DMEM or DMEM (with 10% FBS, v:v) for 1 h at 37  $^\circ\text{C}$ . After that, 10  $\mu\text{M}$  of PF-1 was added to each reaction. The resulting mixture was incubated for an additional 1 h at 37  $^\circ\text{C}$  followed by measurement of fluorescence intensity.

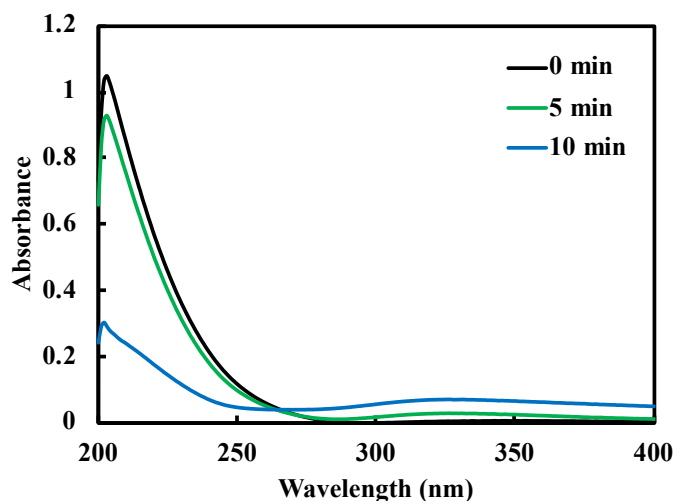

Figure S1. UV-vis spectra of 10 mM  $\text{H}_2\text{O}_2$  upon treatment with CORM-2 (20  $\mu\text{M}$ ) in PBS buffer (pH = 7.4, 10 mM) at room temperature.

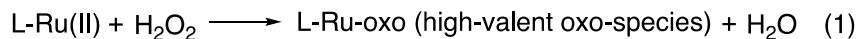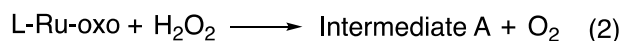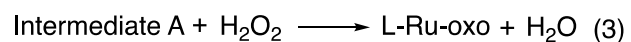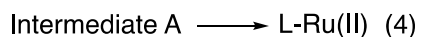

Figure S2. A proposed mechanism for Ru (II)-mediated  $\text{H}_2\text{O}_2$  disproportionation.<sup>7</sup>

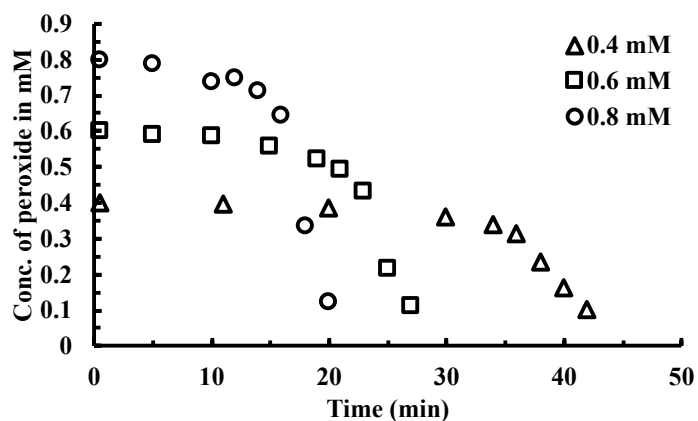

Figure S3. Time-dependent changes of  $\text{H}_2\text{O}_2$  concentration upon incubations with CORM-2 (20  $\mu\text{M}$ ) in PBS (pH=7.4, 0.01 M, 1% DMSO) at 37 °C. The concentration of  $\text{H}_2\text{O}_2$  was monitored by using a titration method.<sup>4</sup>

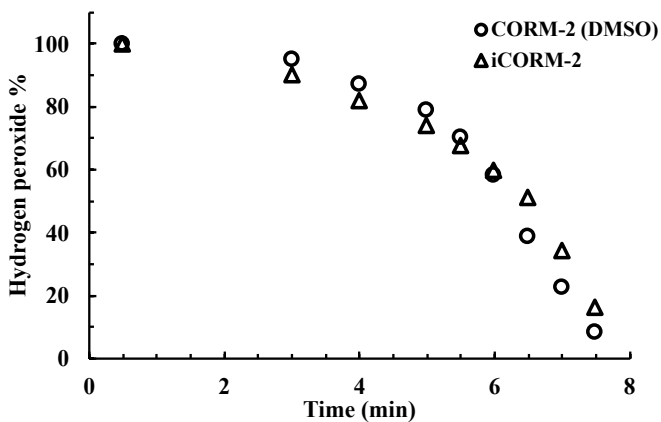

Figure S4. Time-dependent changes of  $\text{H}_2\text{O}_2$  concentration. (expressed as a percentage of the initial concentration: 5 mM) over time upon incubations with CORM-2 (20  $\mu\text{M}$ , diluted from DMSO stock solution) and iCORM-2 (20  $\mu\text{M}$ ) in PBS (pH=7.4, 0.01 M, 1% DMSO) at room temperature. The concentration of  $\text{H}_2\text{O}_2$  was monitored by using a titration method.<sup>4</sup>

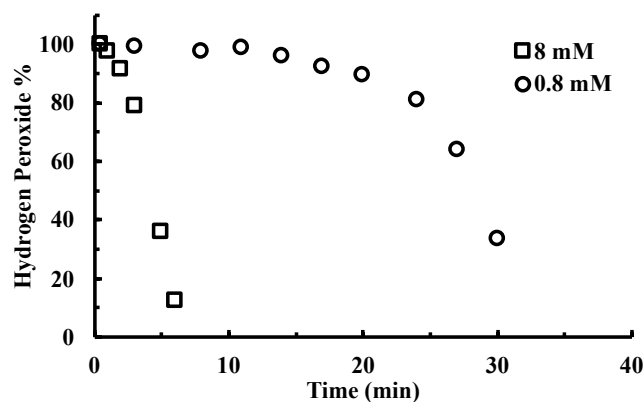

Figure S5. Time-dependent changes of  $\text{H}_2\text{O}_2$  concentration.(expressed as a percentage of the initial concentration: 8 mM or 0.8 mM) over time upon incubations 20  $\mu\text{M}$  CORM-3 in PBS (pH=7.4, 0.01 M) at 37 °C. The concentration of  $\text{H}_2\text{O}_2$  was monitored by using a titration method.<sup>4</sup>

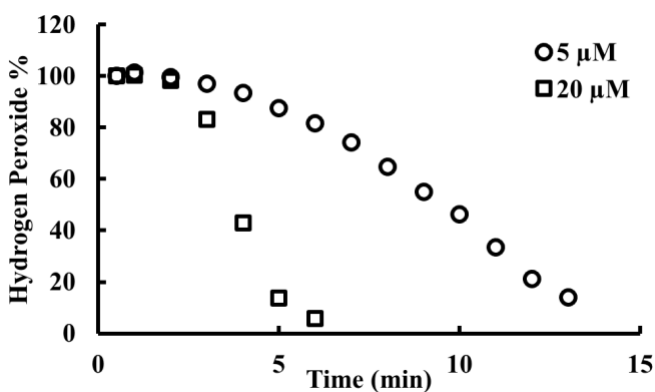

Figure S6. Time-dependent change in  $\text{H}_2\text{O}_2$  concentration (expressed as a percentage of the initial concentration: 5 mM) upon incubations with 5  $\mu\text{M}$  and 20  $\mu\text{M}$  iCORM-3 in PBS (pH=7.4, 0.01 M) at 37 °C. The concentration of  $\text{H}_2\text{O}_2$  was monitored by using a titration method.

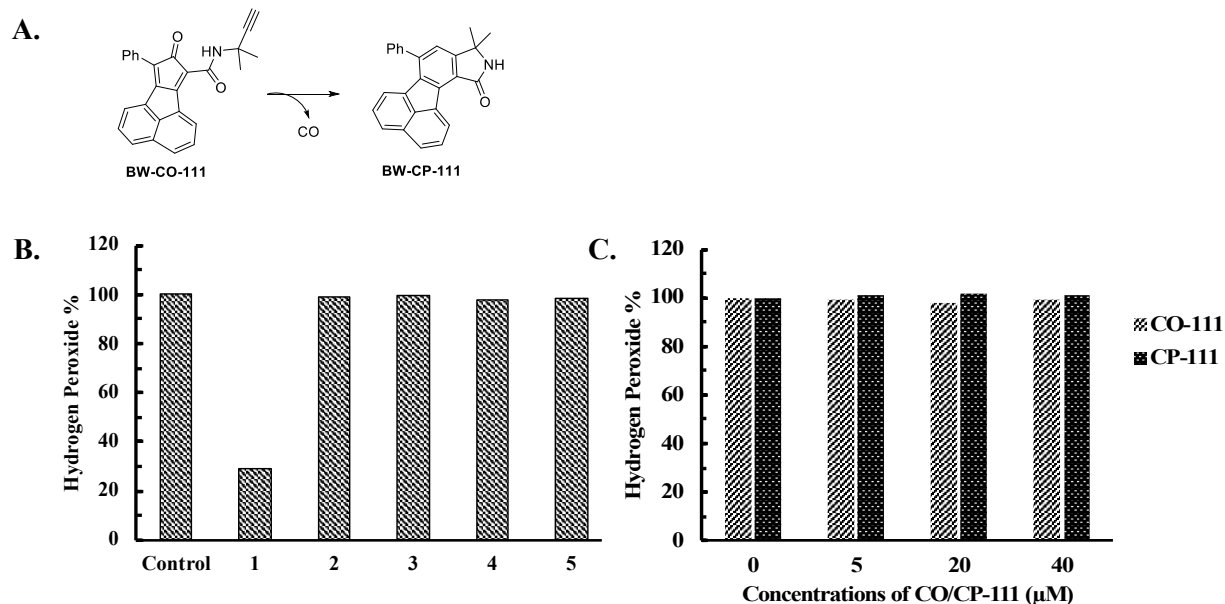

Figure S7. A) CO release from **CO-111**; B) Changes of H<sub>2</sub>O<sub>2</sub> concentration (expressed as a percentage of the initial concentration: 5 mM) upon incubations with blank control; (1) 5 μM CORM-2; (2) 5 μM CO-111; (3) 20 μM CO-111; (4) 5 μM CP-111; and (5) 20 μM CP-111 for 15 min in PBS (pH=7.4, 0.01 M) at room temperature. C) Changes of H<sub>2</sub>O<sub>2</sub> concentration (expressed in the percentage of the initial concentration: 5 mM) upon prolonged incubations with CO-111 and CP-111 for 1 h in PBS (pH=7.4, 0.01 M) at room temperature. The concentration of H<sub>2</sub>O<sub>2</sub> was monitored by using a titration method.<sup>4</sup>

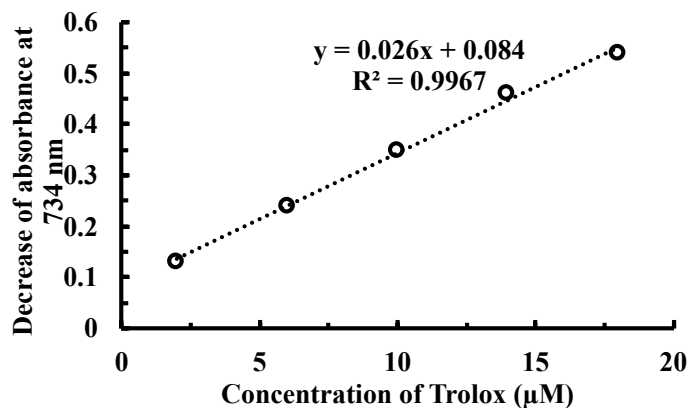

Figure S8. Decrease of UV absorbance (734 nm) of the ABTS radical upon treatment with various concentrations of Trolox.

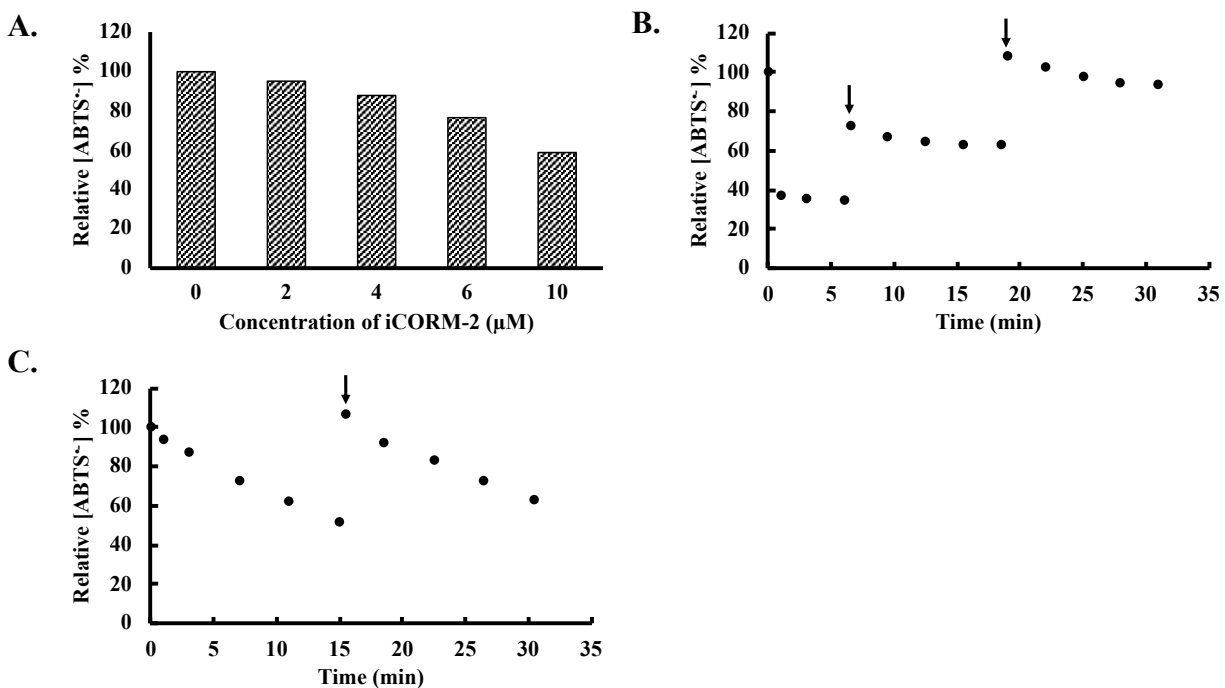

Figure S9. Decrease of ABTS radical concentration (expressed as a percentage of the initial concentration: 50  $\mu$ M, determined using absorbance measured at 734 nm<sup>5</sup>) upon incubations with A) iCORM-2 for 6 min; B) Reinjection of ABTS radical during the Trolox (15  $\mu$ M)-induced consumption of ABTS radical; C) Reinjection of ABTS radical during the iCORM-2 (5  $\mu$ M)-induced consumption of ABTS radical in ethanol containing 20% acetate buffer (20 mM, pH 4.5, v:v).

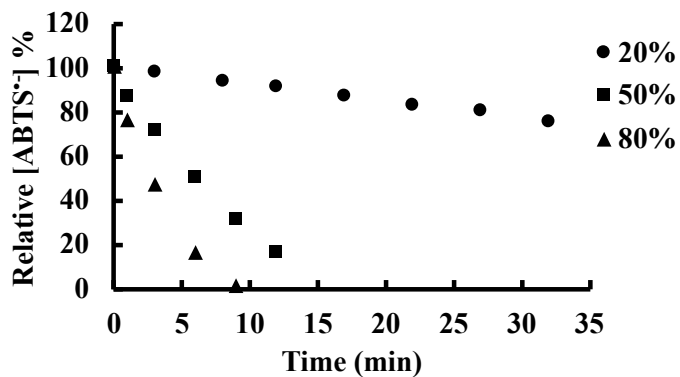

Figure S10. Time-dependent decrease of ABTS radical concentration (expressed as a percentage of the initial concentration: 50  $\mu$ M, determined using absorbance measured at 734 nm<sup>5</sup>) upon incubations with CORM-2 (5  $\mu$ M) in various ratios of ethanol solutions.

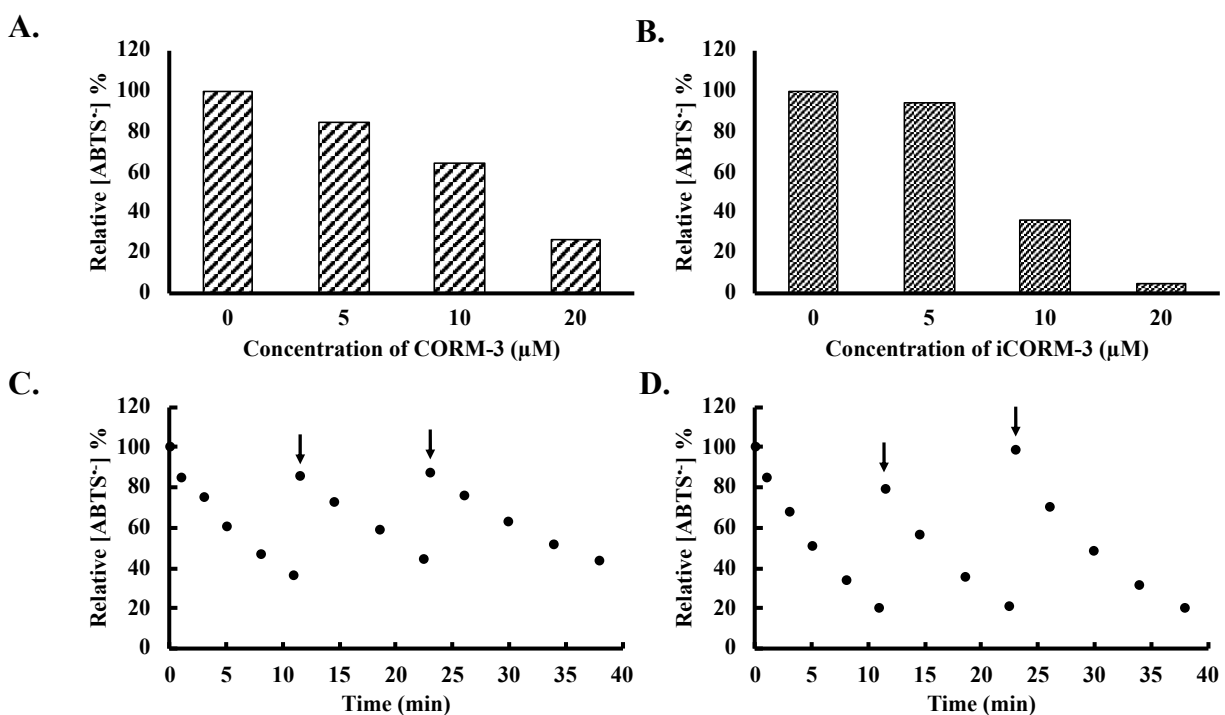

Figure S11. Decrease of ABTS radical concentration (expressed as a percentage of the initial concentration: 50 μM, determined using absorbance measured at 734 nm) upon incubations with A) CORM-3 and B) iCORM-3 for 6 min; C) Reinjection of ABTS radical during the CORM-3 (5 μM)-induced consumption of ABTS radical; D) Reinjection of ABTS radical during the iCORM-3 (5 μM)-induced consumption of ABTS radical in ethanol containing 20% acetate buffer (20 mM, pH 4.5, v:v).

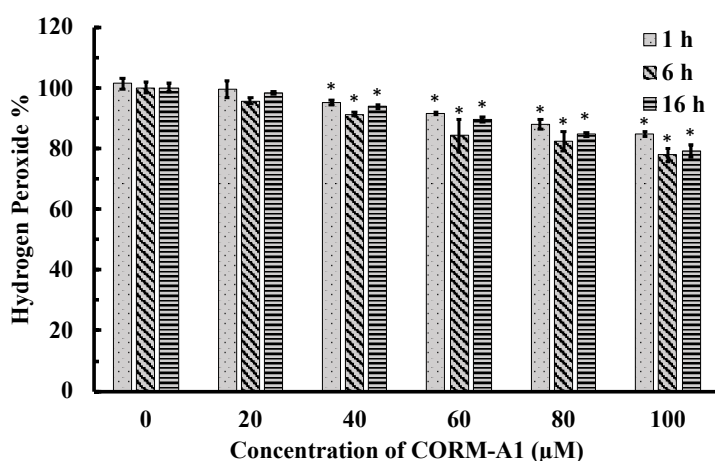

Figure S12. Time-dependent changes of H<sub>2</sub>O<sub>2</sub> concentration (expressed as a percentage of the initial concentration: 300 μM) over time upon incubations with CORM-A1 in PBS (pH=7.4, 0.01 M) at 37 °C. The concentration of H<sub>2</sub>O<sub>2</sub> was monitored by using the titration method. Values are

means  $\pm$  SD.  $n = 3$ . Data with “\*” indicates statistically significant differences between CORM-A1 samples and the negative control as determined by the t-test. \* $P < 0.01$  versus the control group.

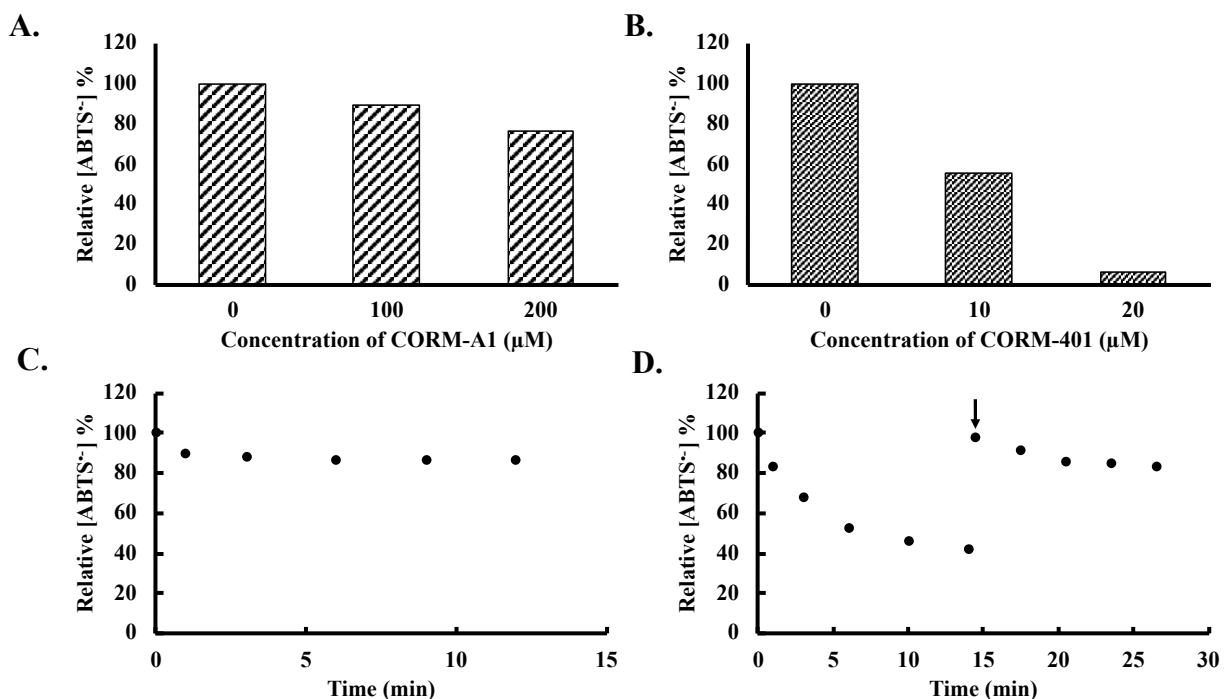

Figure S13. Decrease of ABTS radical concentration (expressed as a percentage of the initial concentration: 50  $\mu$ M, determined using absorbance measured at 734 nm<sup>5</sup>) upon incubations with A) CORM-A1 and B) iCORM-401 for 6 min; C) Time-dependent decrease of ABTS radical upon incubation with CORM-A1 (100  $\mu$ M); D) Reinjection of ABTS radical during the CORM-401 (10  $\mu$ M)-induced consumption of ABTS radical in ethanol containing 20% acetate buffer (20 mM, pH 4.5, v:v).

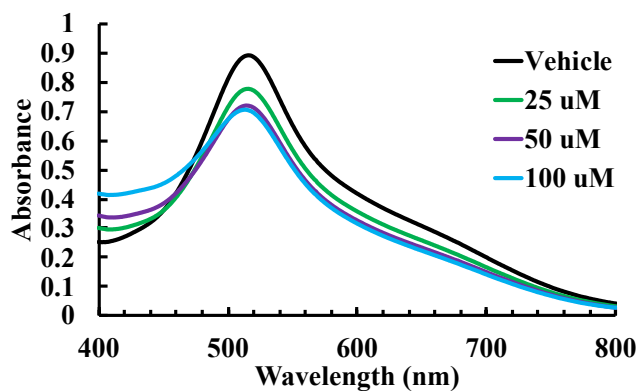

Figure S14. UV-vis spectra of DPPH upon treatment with various concentrations of CORM-A1 (25, 50 and 100  $\mu$ M) in methanol for 1 h at room temperature.

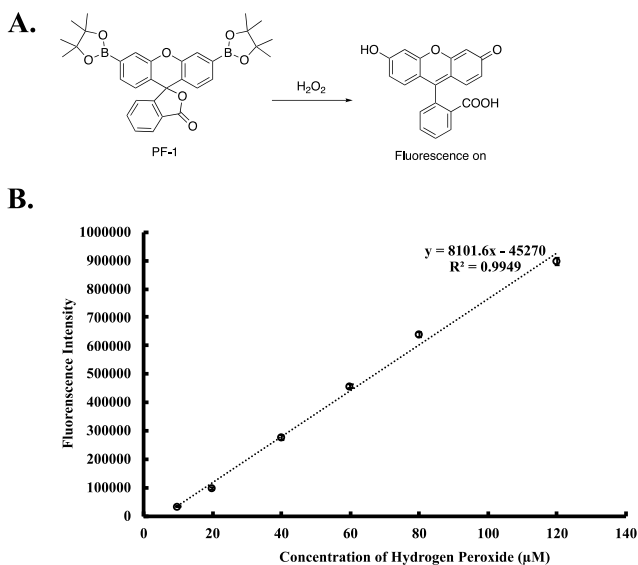

Figure S15. Fluorescence detection of  $\text{H}_2\text{O}_2$  by PF-1. A) Detection mechanism of PF-1; B) Fluorescence response of 10  $\mu\text{M}$  of PF-1 to various concentrations of  $\text{H}_2\text{O}_2$  in DMEM (excitation wavelength: 490 nm; emission wavelength: 525 nm).

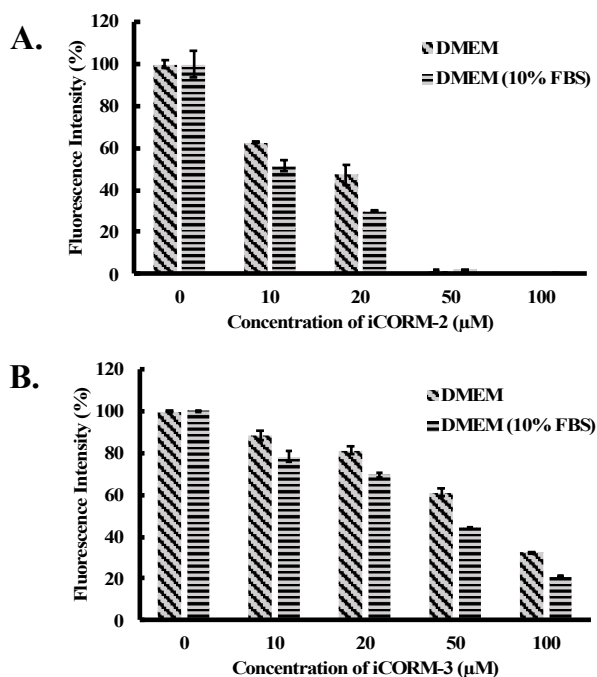

Figure S16. Fluorescence detection of  $\text{H}_2\text{O}_2$  in cell culture medium by PF-1. 100  $\mu\text{M}$  of  $\text{H}_2\text{O}_2$  solutions were incubated with A) iCORM-2 and B) iCORM-3 in DMEM or DMEM (10% FBS) for 1 h at 37  $^\circ\text{C}$ . Values are means  $\pm$  SD.  $n = 3$ .

## Reference

1. E. Clark James, P. Naughton, S. Shurey, J. Green Colin, R. Johnson Tony, E. Mann Brian, R. Foresti and R. Motterlini, *Circ. Res.*, 2003, **93**, e2-e8.
2. D. Babu, G. Leclercq, R. Motterlini and R. Lefebvre, *Front. Pharmacol.*, 2017, **8**, 31.
3. M. C. Y. Chang, A. Pralle, E. Y. Isacoff and C. J. Chang, *J. Am. Chem. Soc.* , 2004, **126**, 15392-15393.
4. C. D. Fernando and P. Soysa, *MethodsX*, 2015, **2**, 283-291.
5. R. Re, N. Pellegrini, A. Proteggente, A. Pannala, M. Yang and C. Rice-Evans, *Free Radic. Biol. Med.* , 1999, **26**, 1231-1237.
6. M. Ozgen, R. N. Reese, A. Z. Tulio, J. C. Scheerens and A. R. Miller, *J. Agric. Food Chem.* , 2006, **54**, 1151-1157.
7. S. Choua, P. Pacheco, C. Coquelet and E. Bienvenüe, *J. Inorg. Biochem.* , 1997, **65**, 79-85.
